# Supplementary material for: The ‘CαNN’ motif: an intrinsic lover of sulfate and phosphate ions
Source: Royal Society of Chemistry journal article supplement (doi:10.1039/c6ra07012d), 2016-01-01
Supplement: c6ra07012d1.pdf [file c6ra07012d1.pdf]

## Supplementary information

### The 'C<sup>α</sup>NN' motif: an intrinsic lover of sulfate and phosphate ions

**Tridip Sheet, Raja Banerjee\***

Maulana Abul Kalam Azad University of Technology, West Bengal  
(Formerly Known as West Bengal University of Technology)  
BF-142, Sector-1, Salt Lake, Kolkata- 700064, INDIA

Telephone No: 91-33-23341021/1031; Fax: 91-33-2334-1030  
Email: ban\_rajaa@yahoo.com, banraja10@gmail.com

**Short title:** Anion-recognition peptide motif

\* Correspondence to: Raja Banerjee, Maulana Abul Kalam Azad University of Technology, West Bengal, (Formerly known as West Bengal University of Technology) BF-142, Sector-1, Salt Lake, Kolkata-700064, India. E-mail: ban\_rajaa@yahoo.com, banraja10@gmail.com

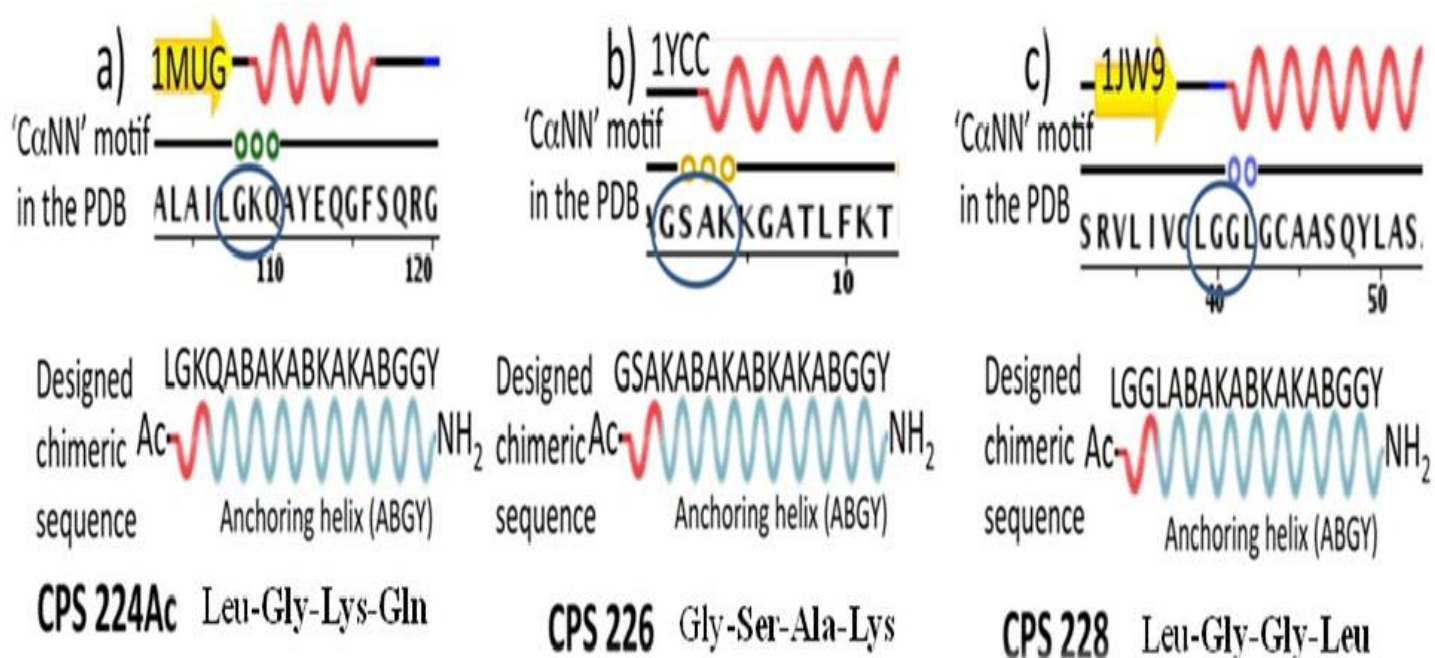

**Figure S1:** Design of peptides a) CPS224Ac, b) CPS226 and c) CPS228 by appending the 'C $\alpha$ NN' sequences from the respective PDB (1MUG for CPS224Ac; 1YCC for CPS226 and 1JW9 for CPS228)

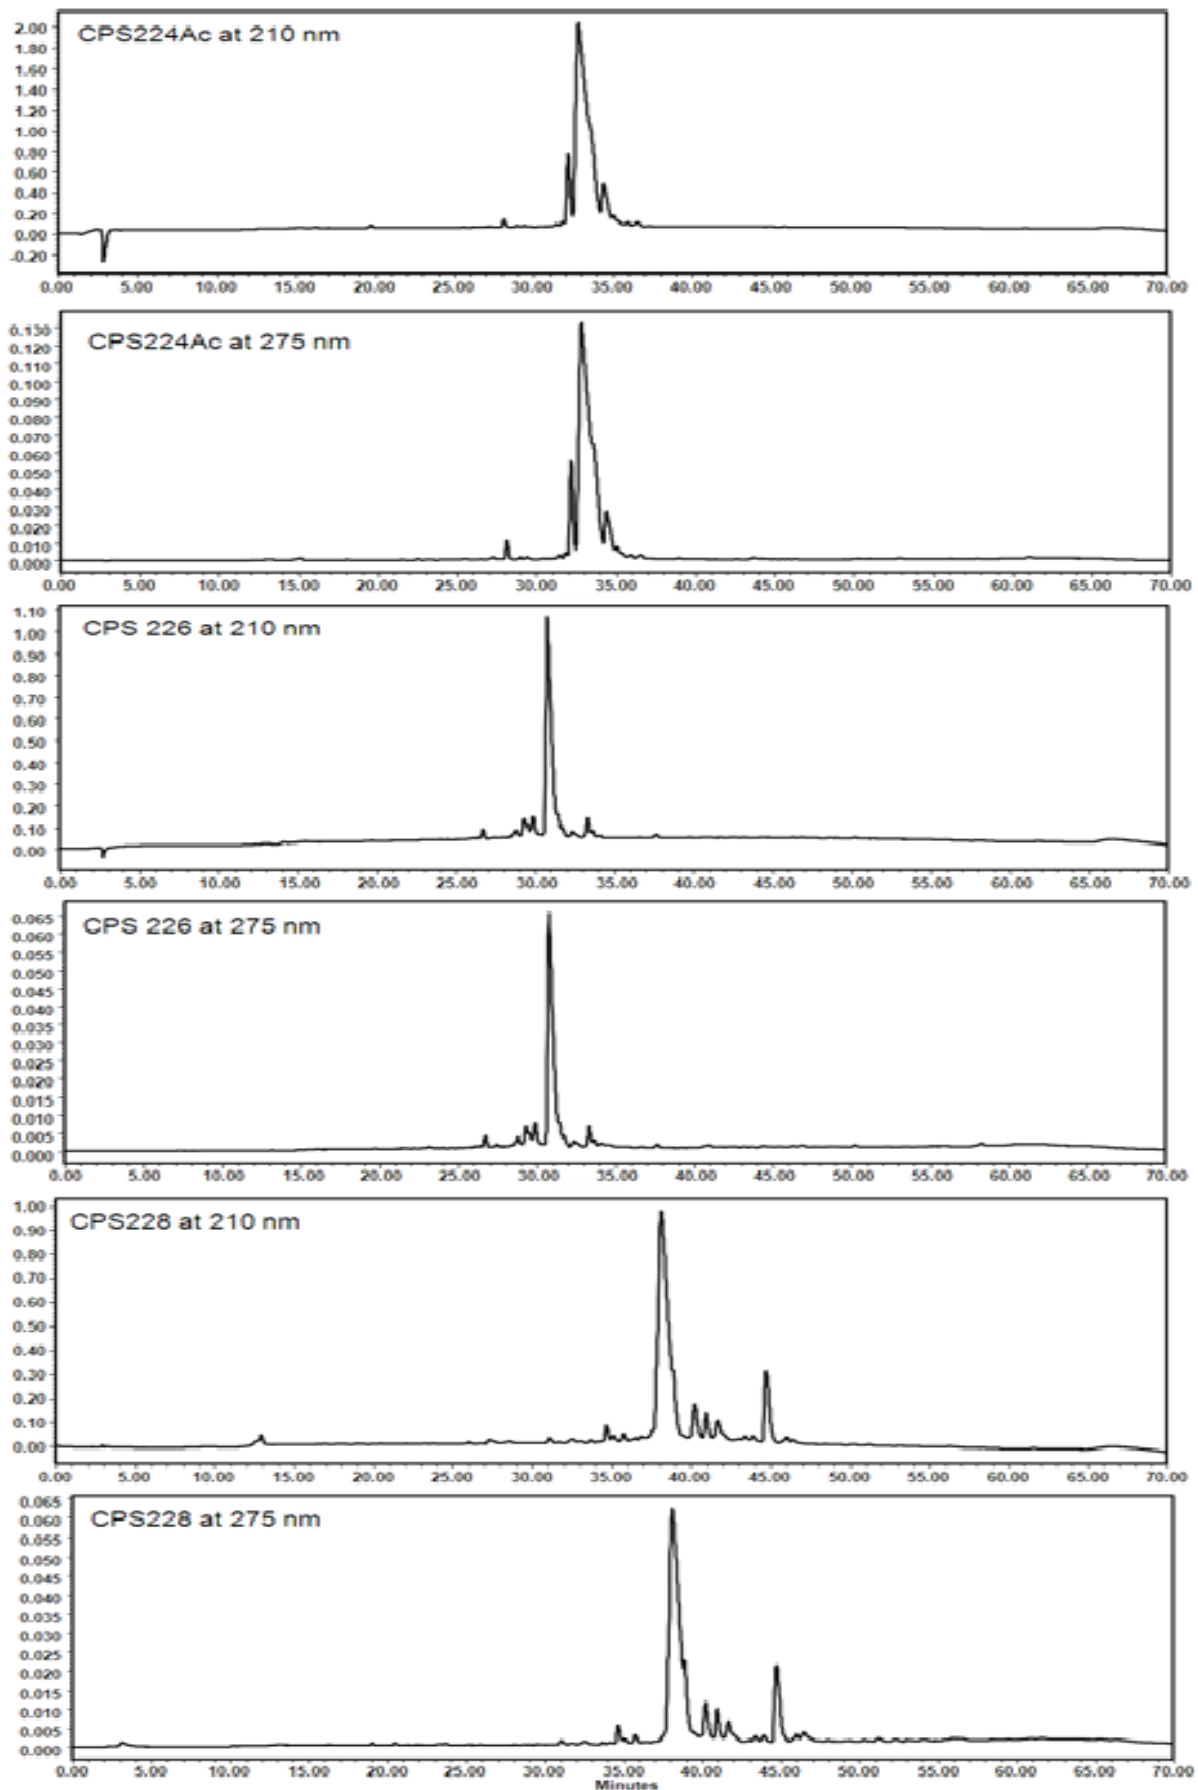

**Figure S2:** HPLC traces of the 18-residue peptides (CPS224Ac, CPS226 and CPS228) containing the naturally occurring 'C<sup>α</sup>NN' motif sequences using gradient of 0-60% acetonitrile in water with 0.1% TFA in dual  $\lambda$  absorbance detector (at 210 and 275 nm).

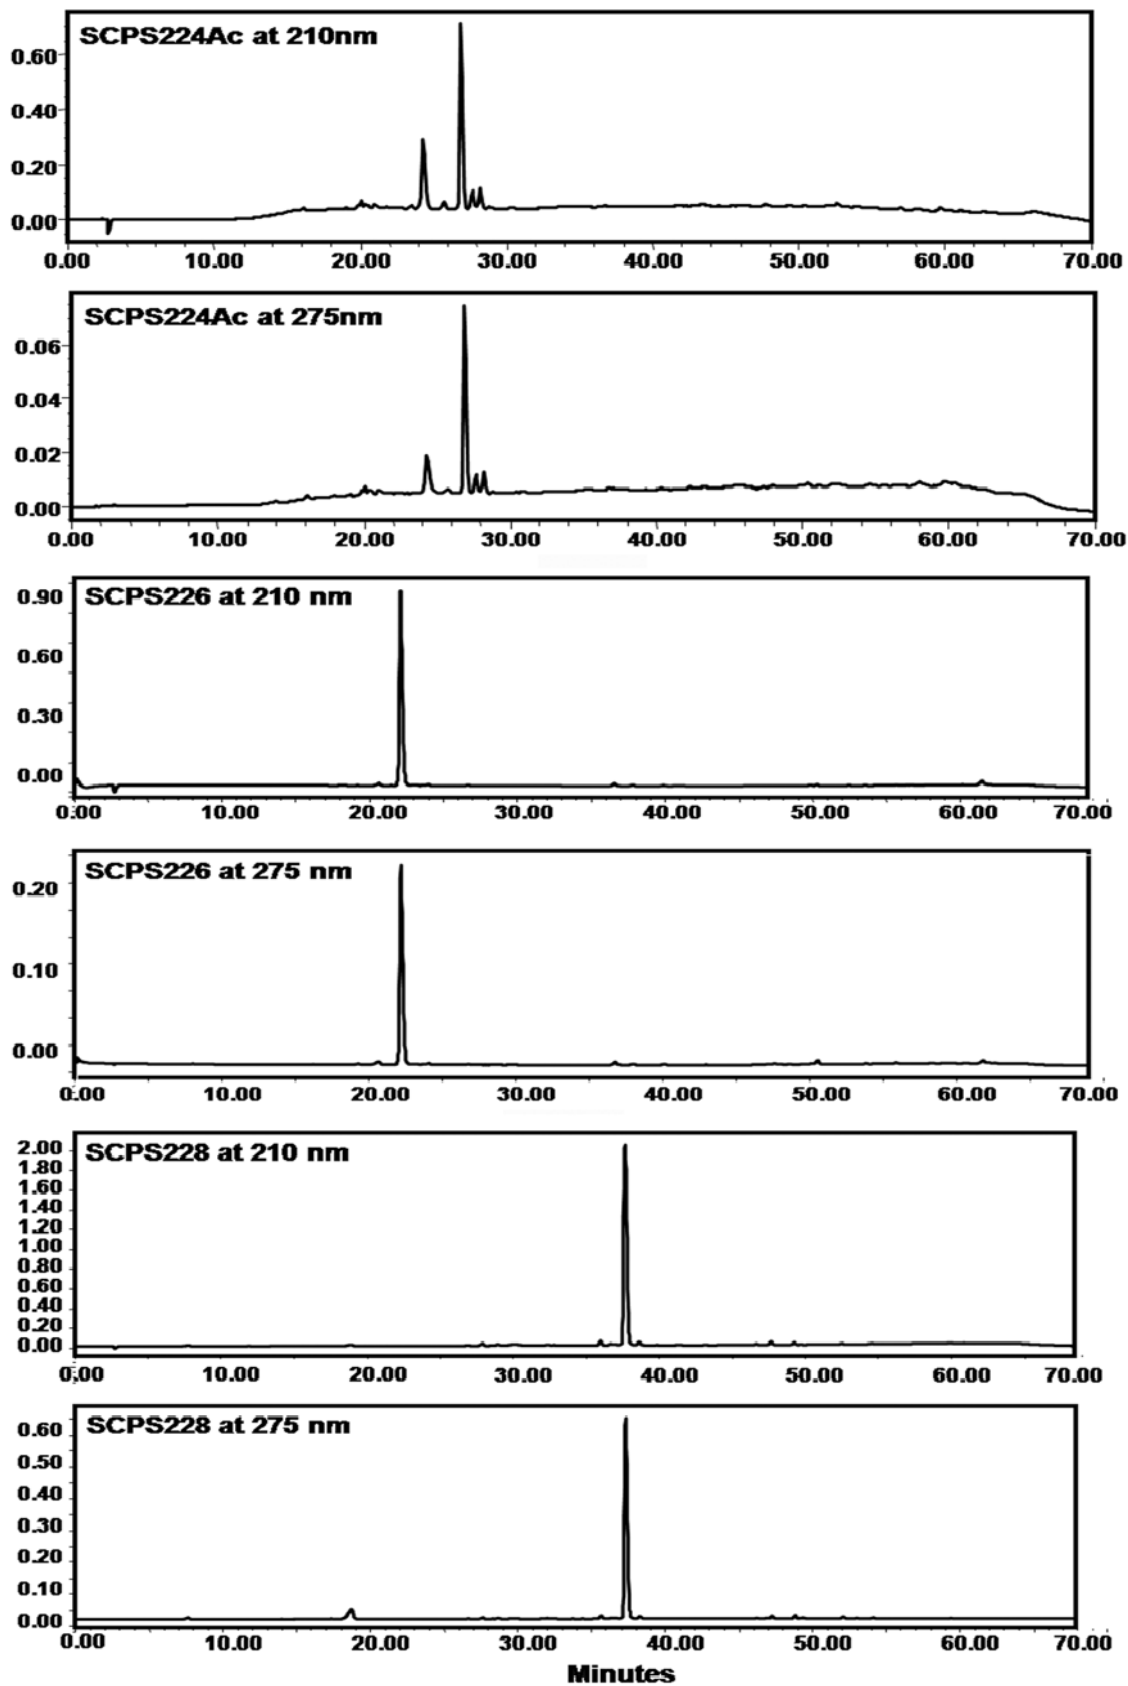

**Figure S3:** HPLC traces of the short 7-residue peptides (SCPS224Ac, SCPS226 and SCPS228) containing the naturally occurring 'C<sup>α</sup>NN' motif sequences using gradient of 0-60% acetonitrile in water with 0.1% TFA in dual  $\lambda$  absorbance detector (at 210 and 275 nm).

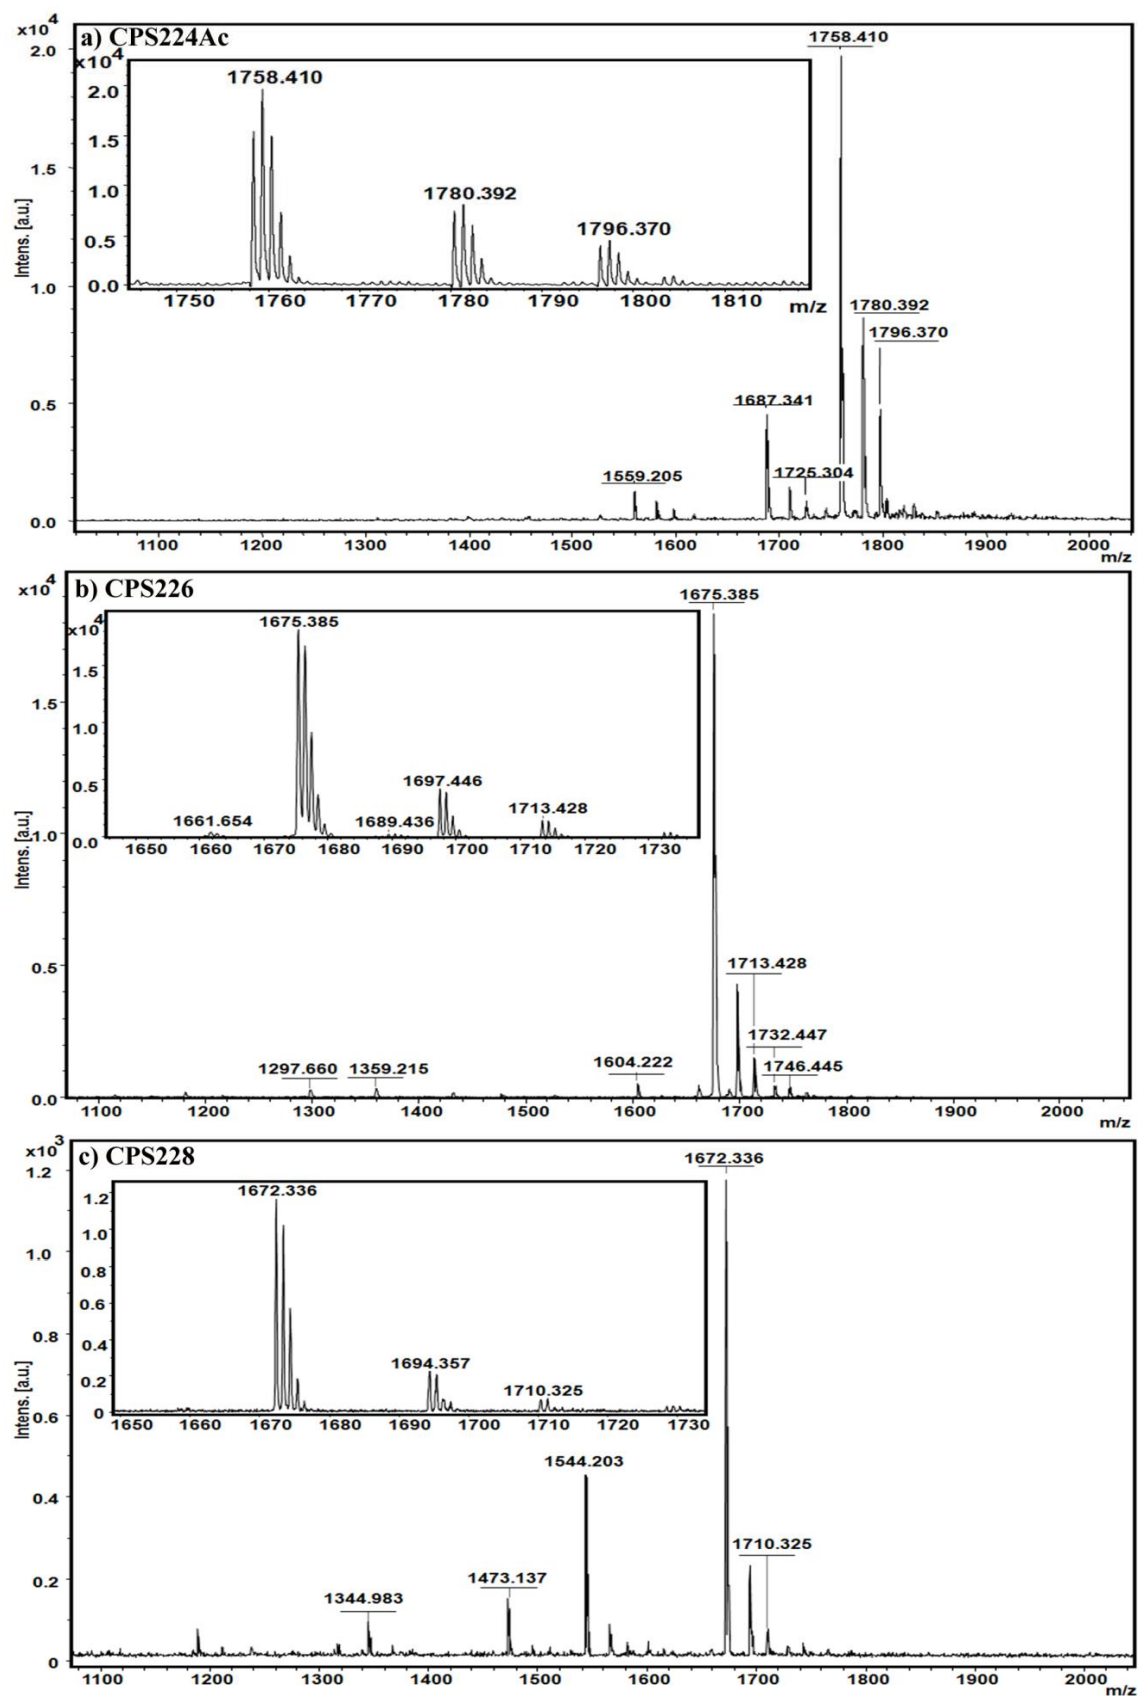

**Figure S4:** MALDI-MS (in the positive mode) traces of the 18-residue peptides [CPS224Ac (MW: 1757), CPS226 (MW: 1674) and CPS228 (MW: 1671)] containing the naturally occurring ‘C<sup>α</sup>NN’ motif sequences showing the m/z peaks (z=1) corresponding to respective M+H<sup>+</sup>; M+Na<sup>+</sup> and M+K<sup>+</sup> ions

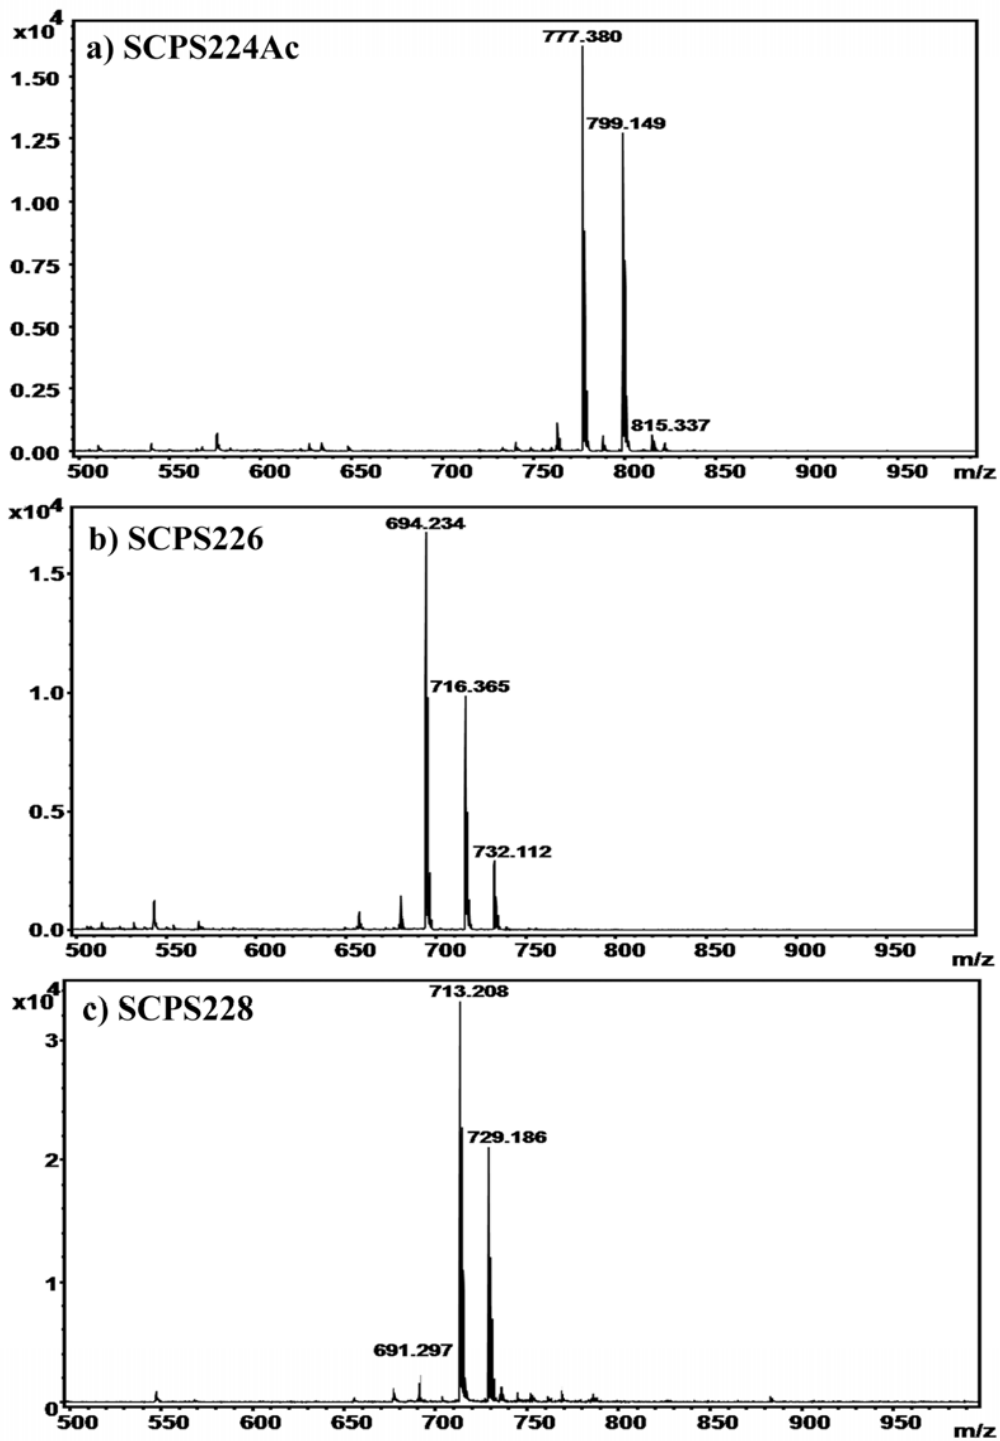

**Figure S5:** MALDI-MS (in the positive mode) traces of the short 7-residue peptides [SCPS224Ac (MW: 776), SCPS226 (MW: 693) and SCPS228 (MW:690)] containing the naturally occurring 'C<sup>α</sup>NN' motif sequences showing the m/z peaks (z=1) corresponding to respective M+H<sup>+</sup>; M+Na<sup>+</sup> and M+K<sup>+</sup> ions

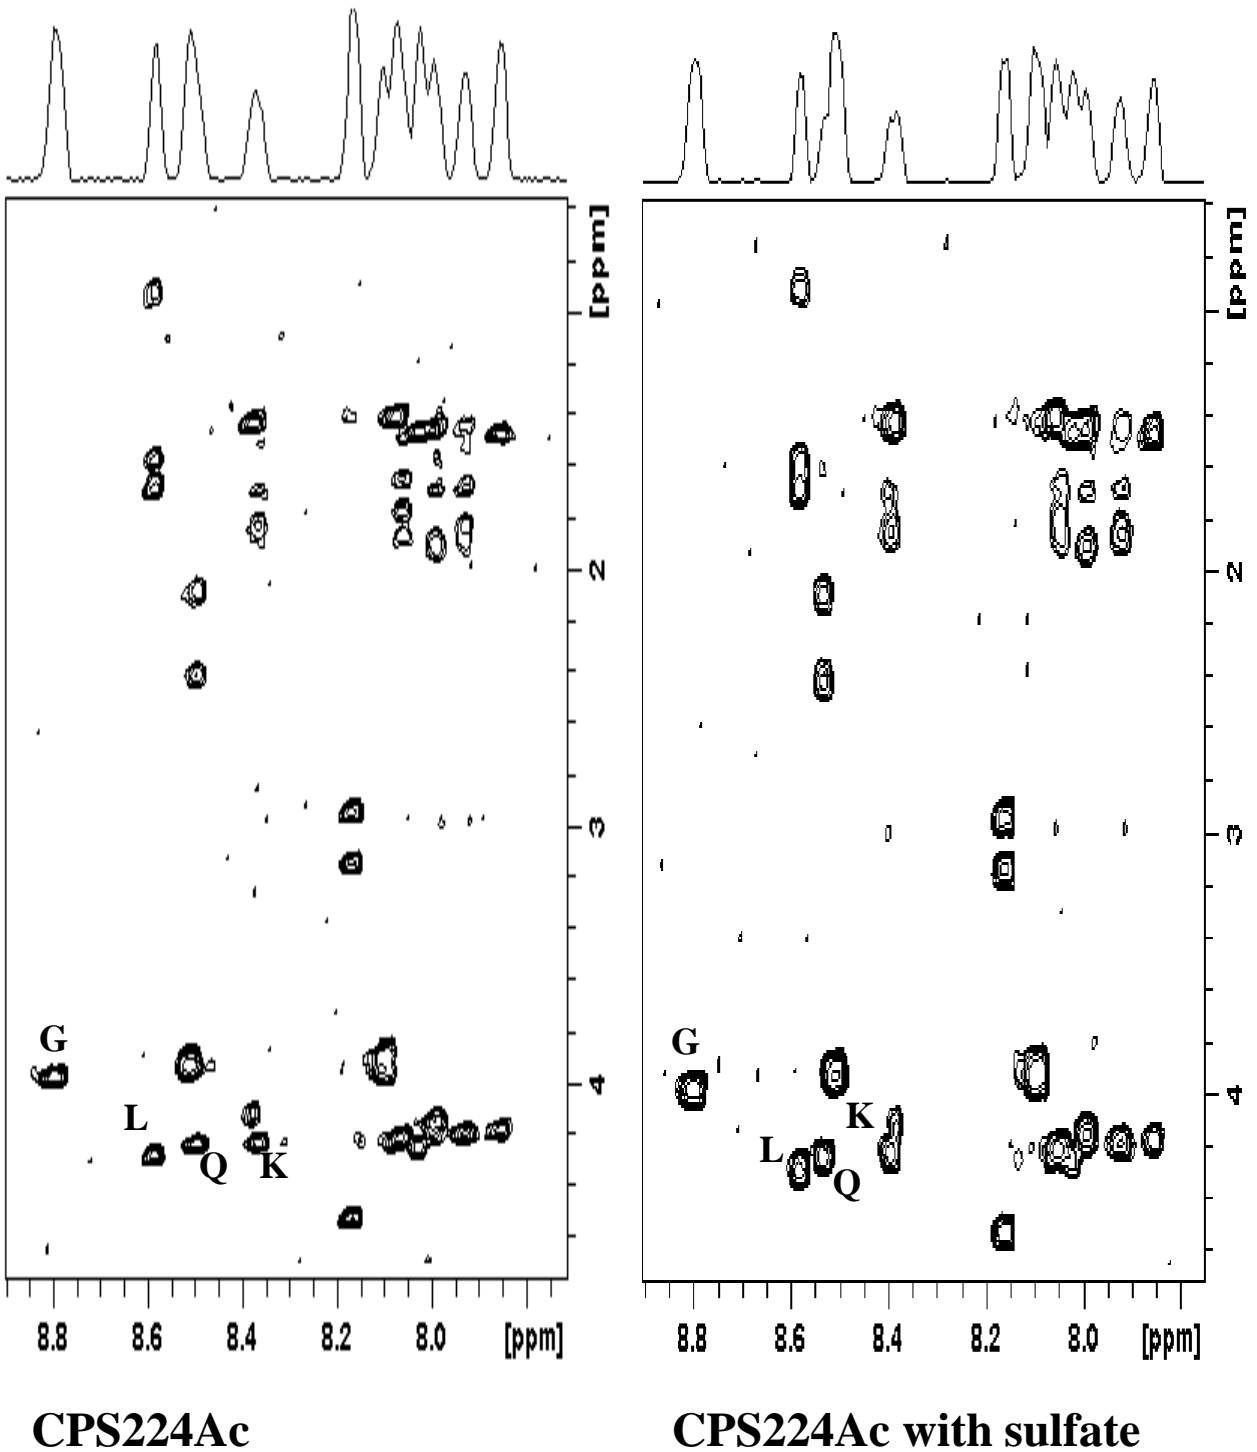

**Figure S6:** TOCSY experiments of CPS224Ac and sulfate added species of CPS224Ac (1:3 M peptide : anion). The 'C<sup>α</sup>NN' motif sequence (-Leu-Gly-Lys-Gln-) present at N-terminus is labeled.

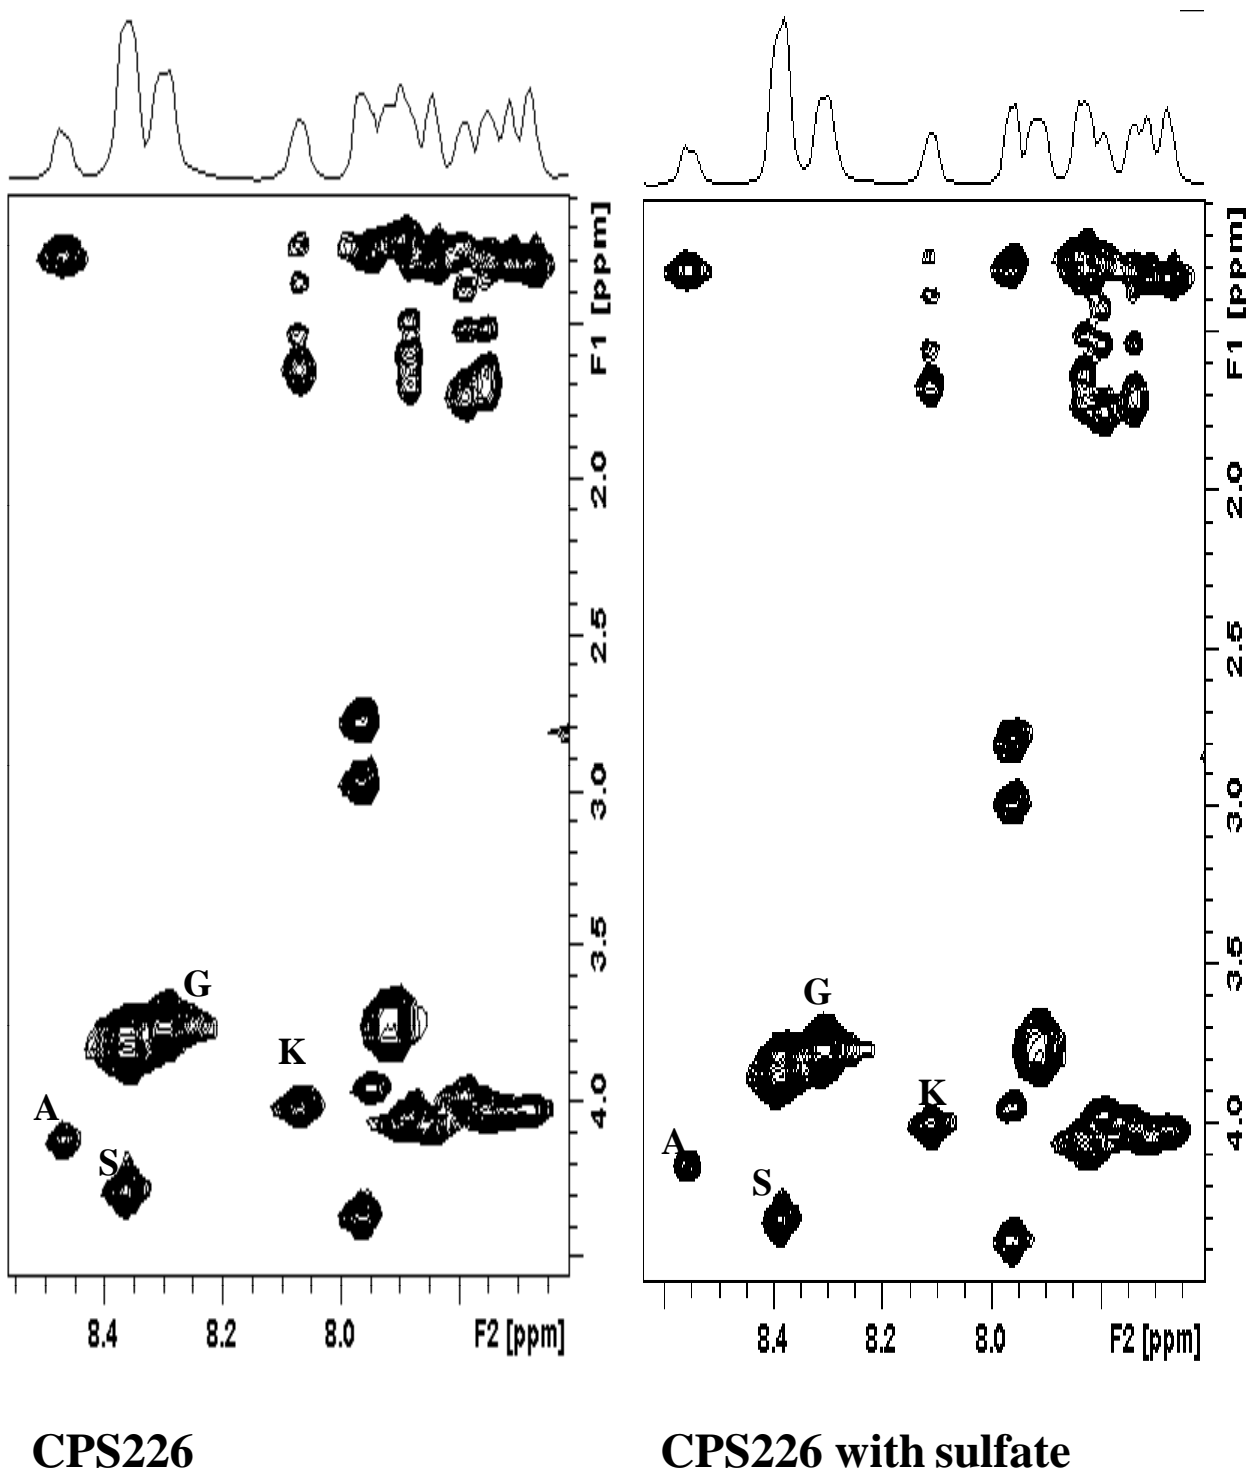

**Figure S7:** TOCSY experiments of CPS226 and sulfate added species of CPS226 (1:3 M peptide : anion). The ‘C<sup>α</sup>NN’ motif sequence (–Gly-Ser-Ala-Lys–) present at the N-terminus is labeled.



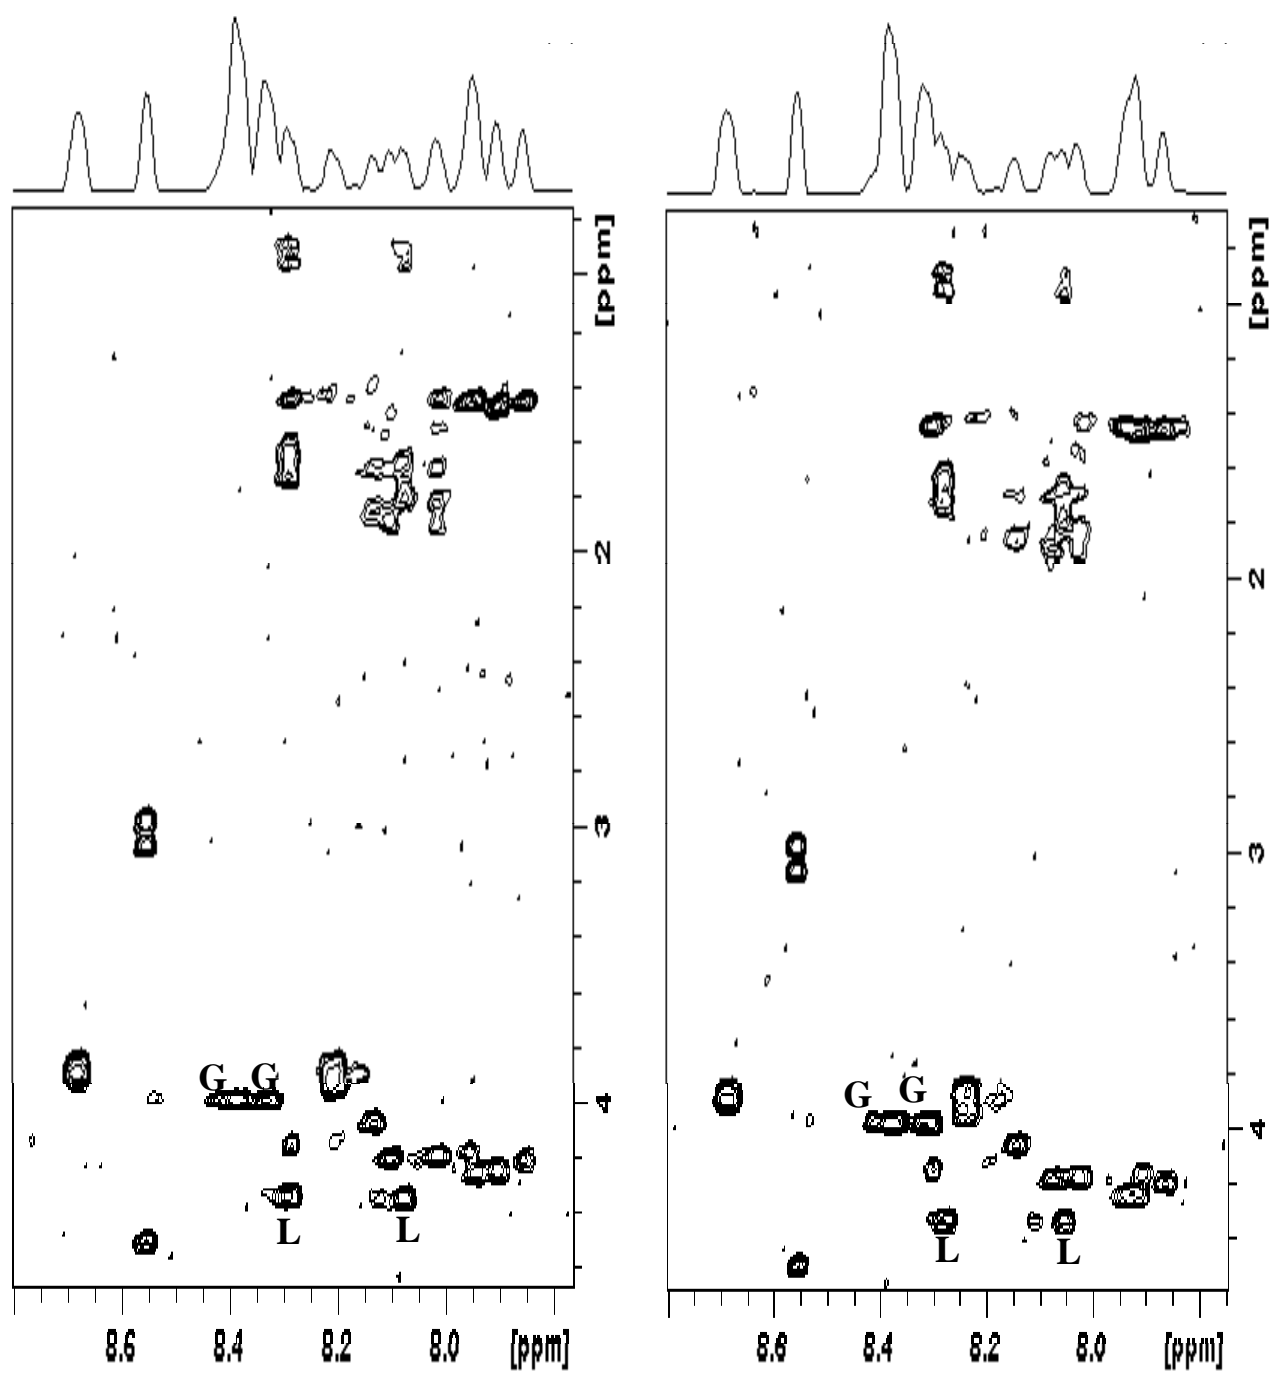

**CPS228**

**CPS228 with sulfate**

**Figure S8:** TOCSY experiments of CPS228 and sulfate ion added species of CPS228 (1:3 M peptide : anion). The ‘C<sup>α</sup>NN’ motif sequence (-Leu-Gly-Gly-Leu-) present at N-terminus is labeled.

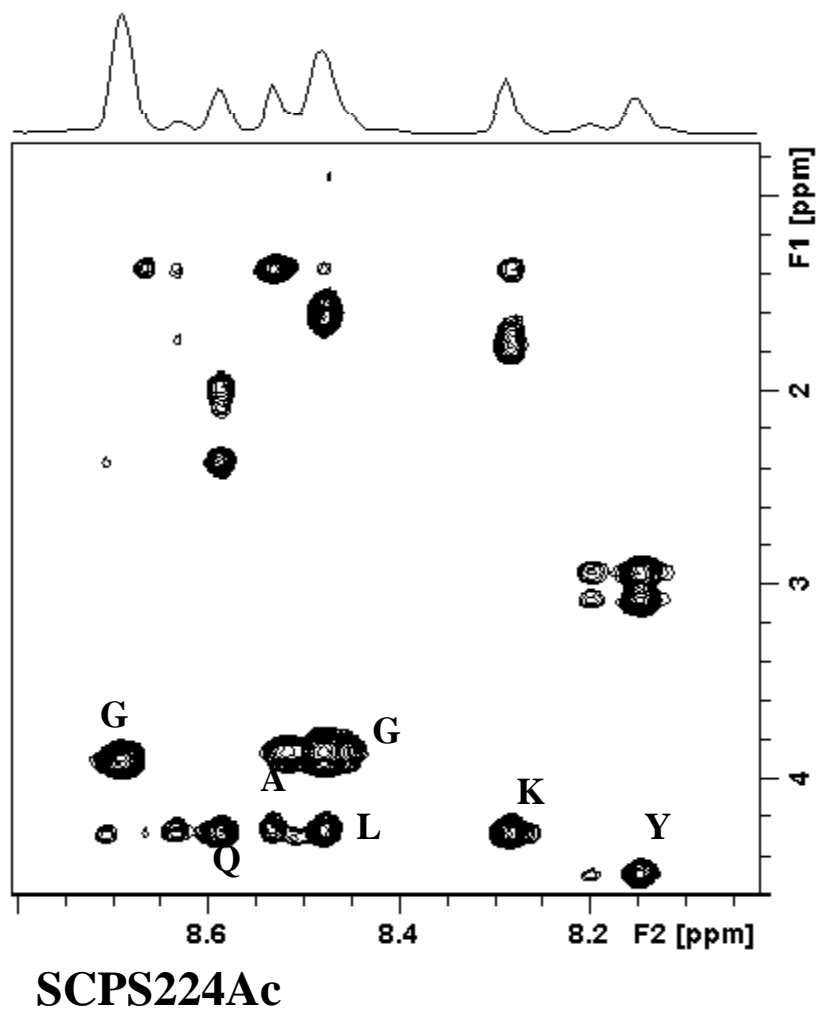

**Figure S9:** TOCSY experiments of SCPS224Ac. The residues of the sequence (-Leu-Gly-Lys-Gln-Ala-Gly-Tyr) are labeled with one letter symbol.

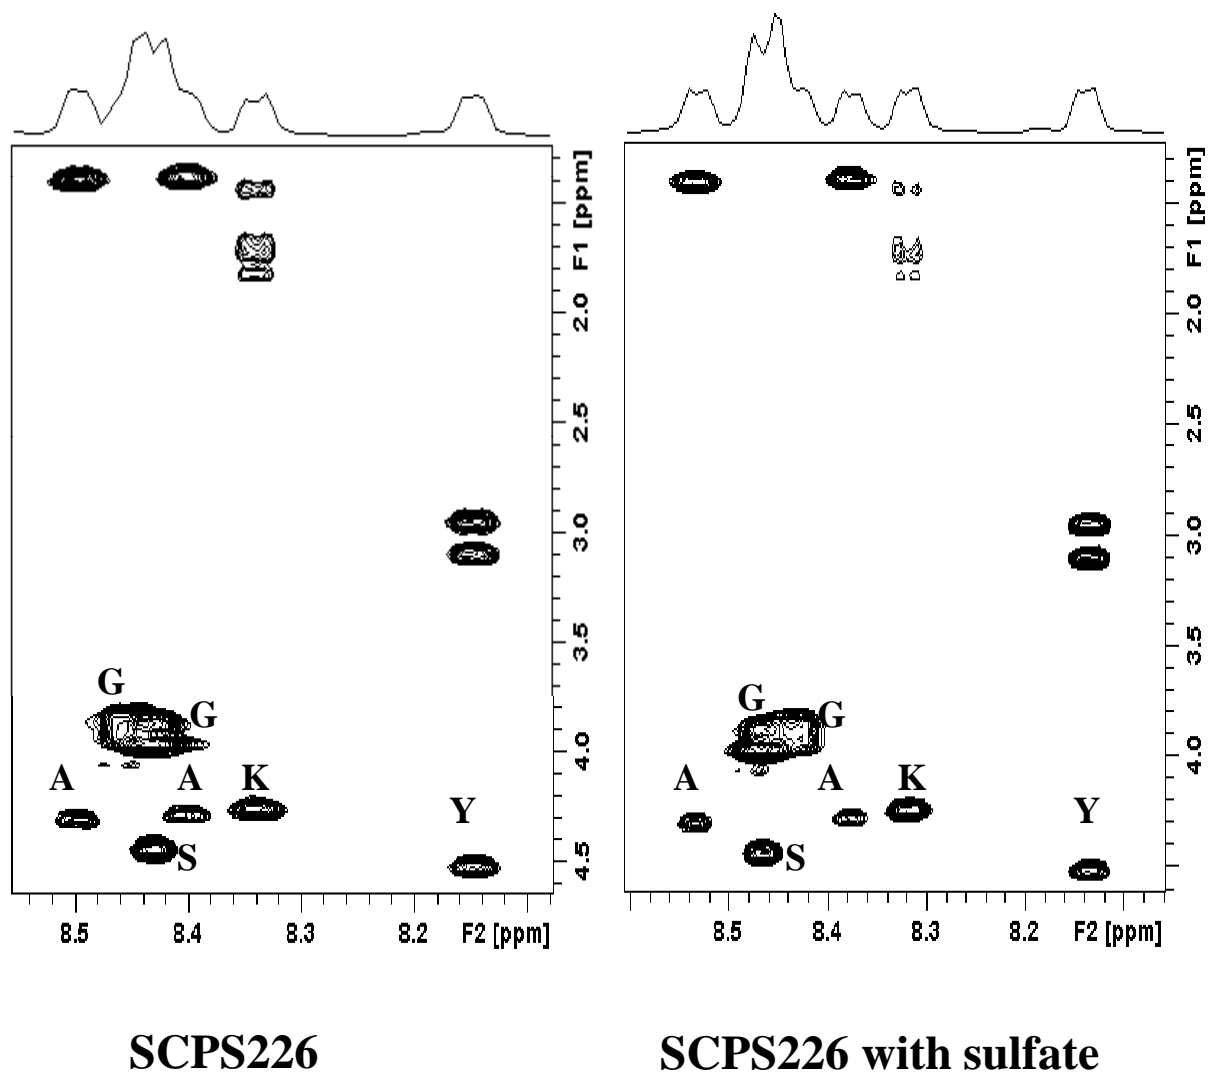

**Figure S10:** TOCSY experiments of SCPS226 and sulfate added species of SCPS226 (1:3 M peptide : anion). The residues of the sequence (-Gly-Ser-Ala-Lys-Ala-Gly-Tyr) are labeled with one letter symbol.

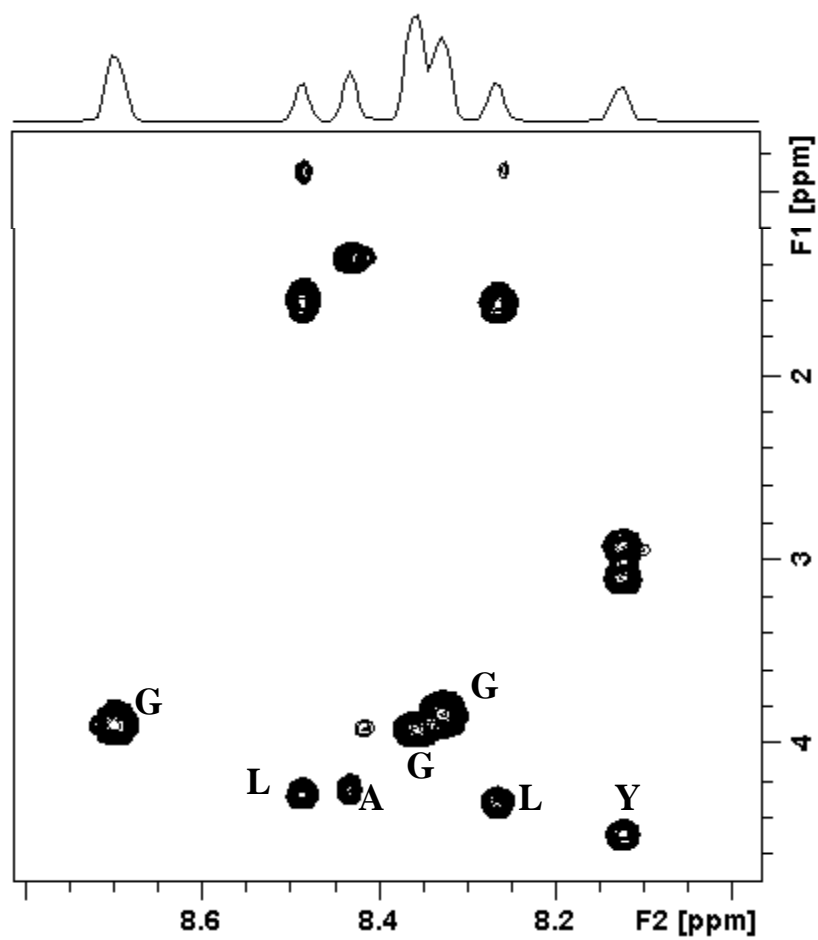

## SCPS228

**Figure S11:** TOCSY experiments of SCPS228. The residues of the sequence (-Leu-Gly-Gly-Leu-Ala-Gly-Tyr-) are labeled with one letter symbol.

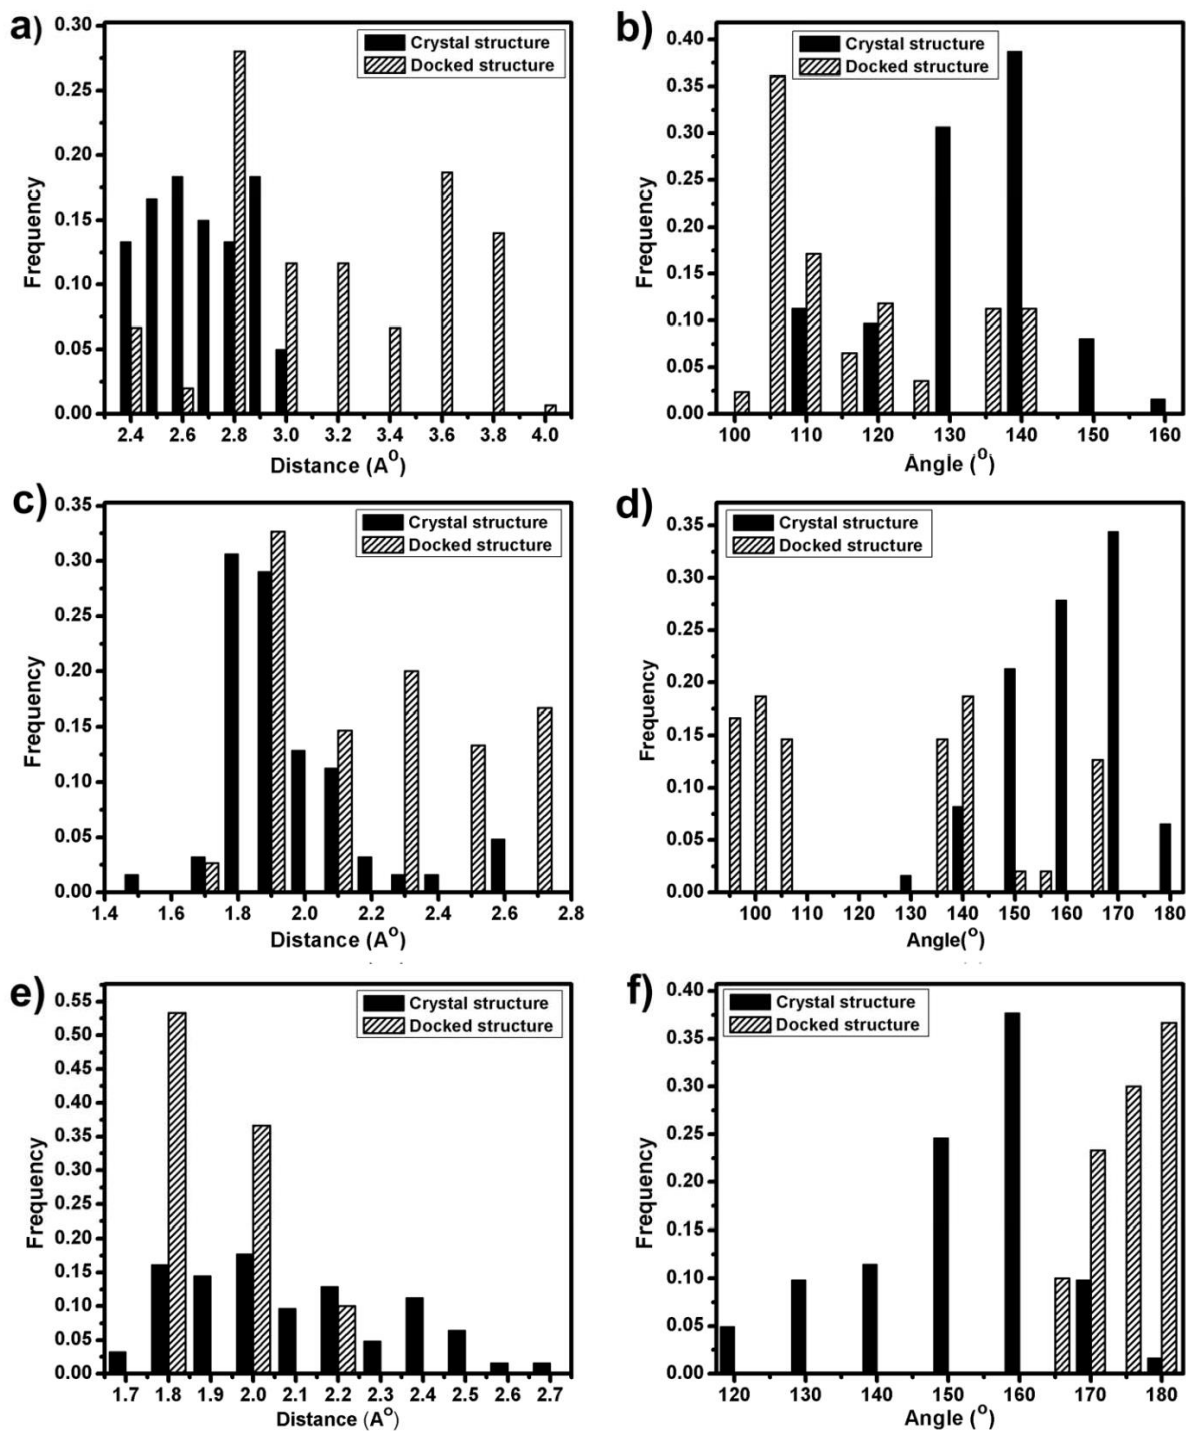

**Figure S12:** Comparison of X-H---O (where X=  $C^{\alpha}_{-1}/N_0/N_{+1}$ ) distance and angle constraints of the anion added 'C $^{\alpha}$ NN' sequences between the respective crystal structures (obtained from pdb) and the structures obtained from Molecular docking experiment for the designed chimeric peptide sequences (CPS224Ac, CPS226 and CPS228). a)  $C^{\alpha}_{-1}$ -H---O distance; b)  $C^{\alpha}_{-1}$ -H---O angle; c)  $N_0$ -H---O distance; d)  $N_0$ -H---O angle; e)  $N_{+1}$ -H---O distance, f)  $N_{+1}$ -H---O angle.

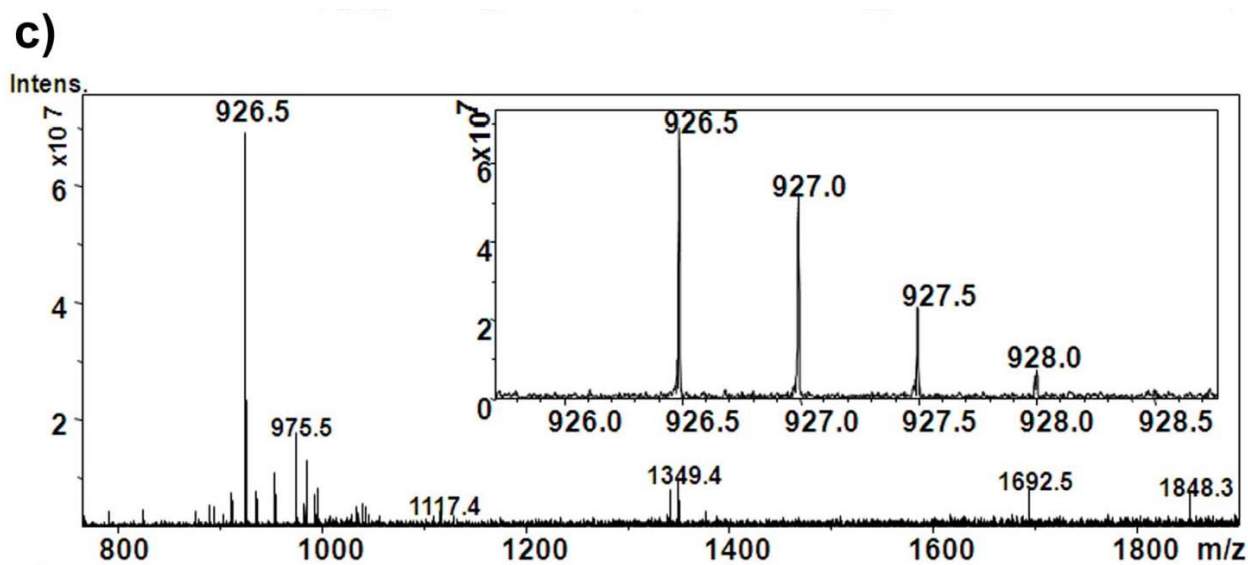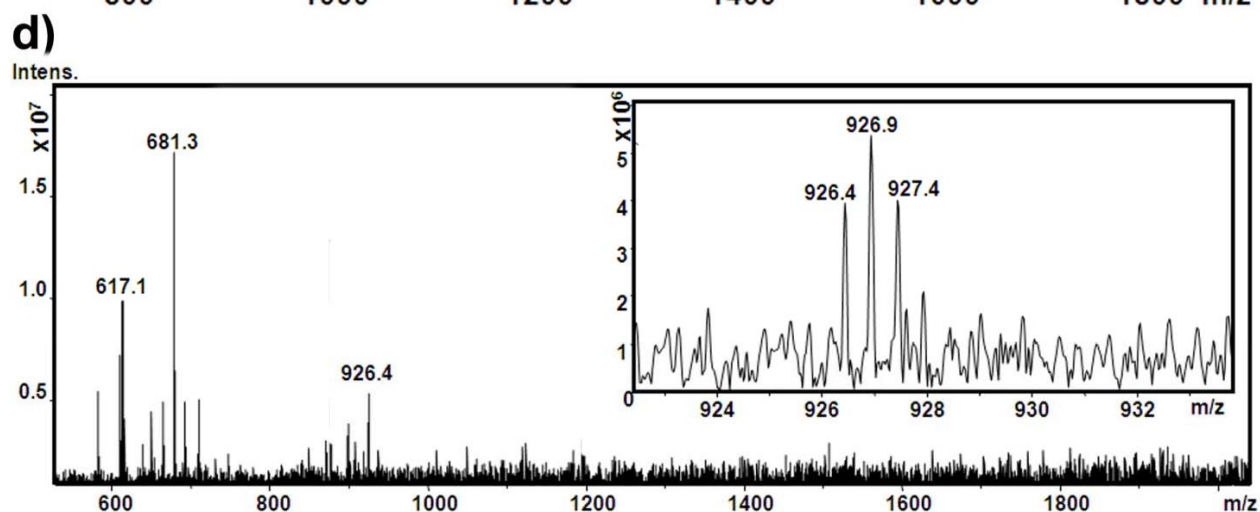

**Figure S13** c) ESI-MS result showing the binding of the sulfate ion with CPS224Ac (Inset: isotopic distribution of m/z 926.5 showing the difference of 0.5, indicating doubly charged species); d) ESI-MS result showing the binding of phosphate ion with CPS224Ac (Inset: isotopic distribution of m/z 926.4 showing the difference of 0.5, indicating doubly charged species) [Reproduced from Figure 1 of Plos One 8(3), (2013) e57366 by Tridip Sheet, Subhrangsh Supakar & **Raja Banerjee\*** (<http://www.ncbi.nlm.nih.gov/pubmed/23516403>) under the terms of the Creative Commons Attribution License, which permits, unrestricted use, distribution, and reproduction in any medium]

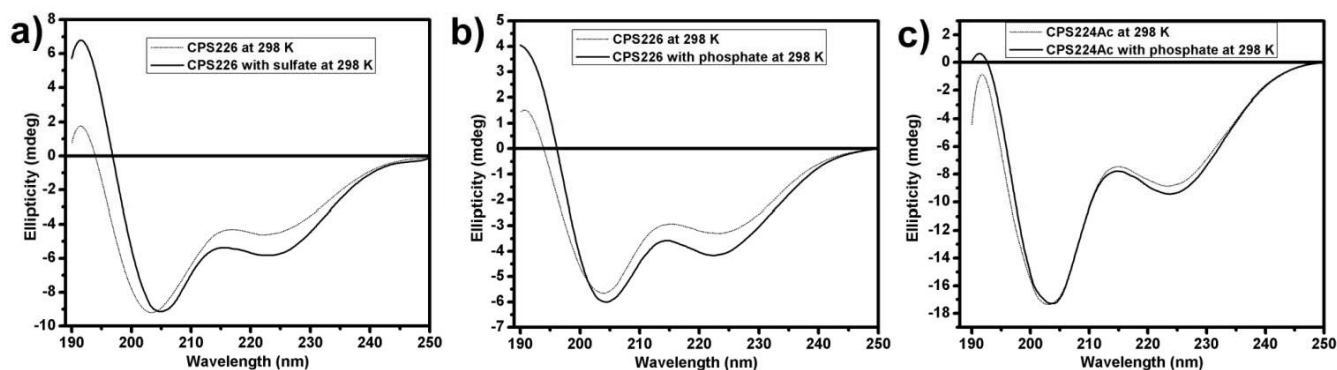

**Figure S14:** CD spectra of peptides in fully aqueous condition at 298 K in absence as well as in presence of anions. a) CPS226 with sulfate; b) CPS226 with phosphate and c) CPS224Ac with phosphate.

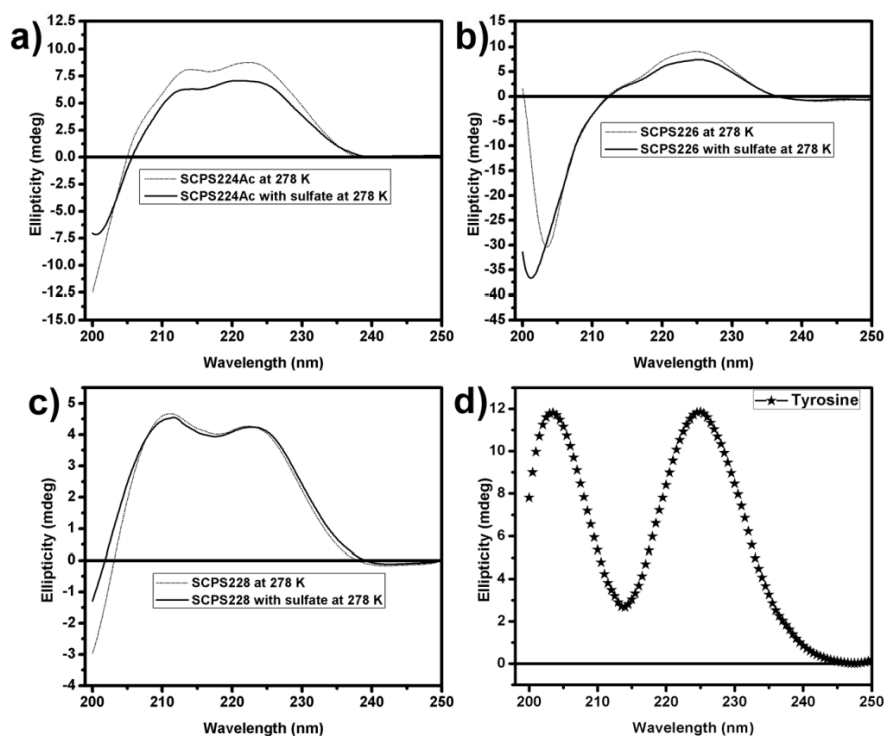

**Figure S15:** CD spectra of short peptides along with their sulfate added species and free tyrosine recorded at 278 K in fully aqueous condition; a) SCPS224Ac; b) SCPS226; c) SCPS228; d) tyrosine in aqueous solution.

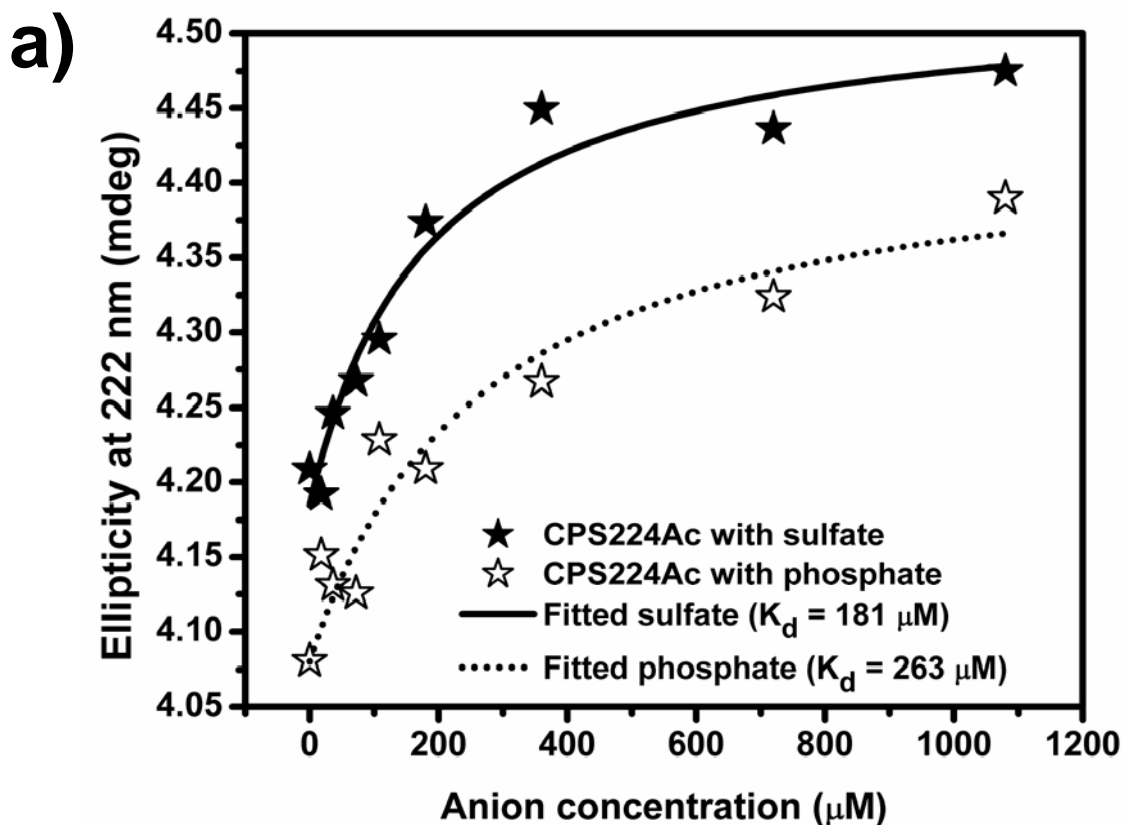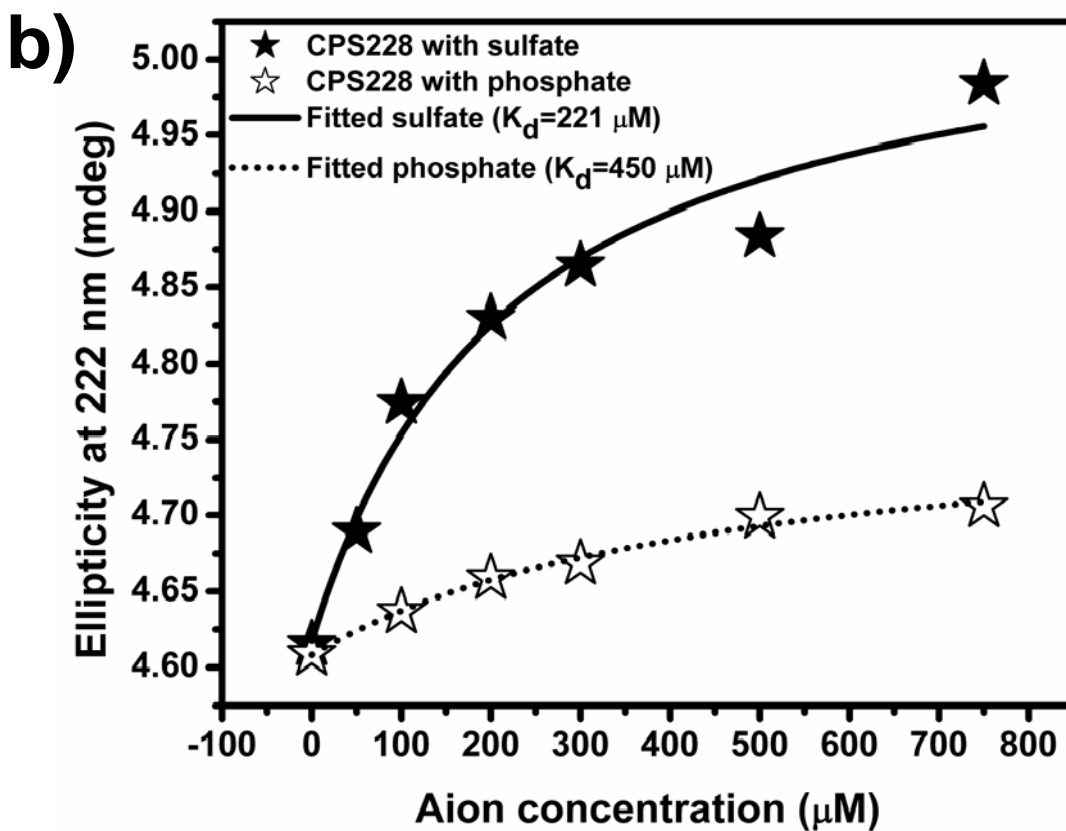

**Figure S16:** Change of ellipticity at 222nm ( $\theta_{222}$ ) with respect to added anion (sulfate and phosphate) in CD measurement of peptides a) CPS224Ac and b) CPS228 along with their respective anion dependent  $K_d$



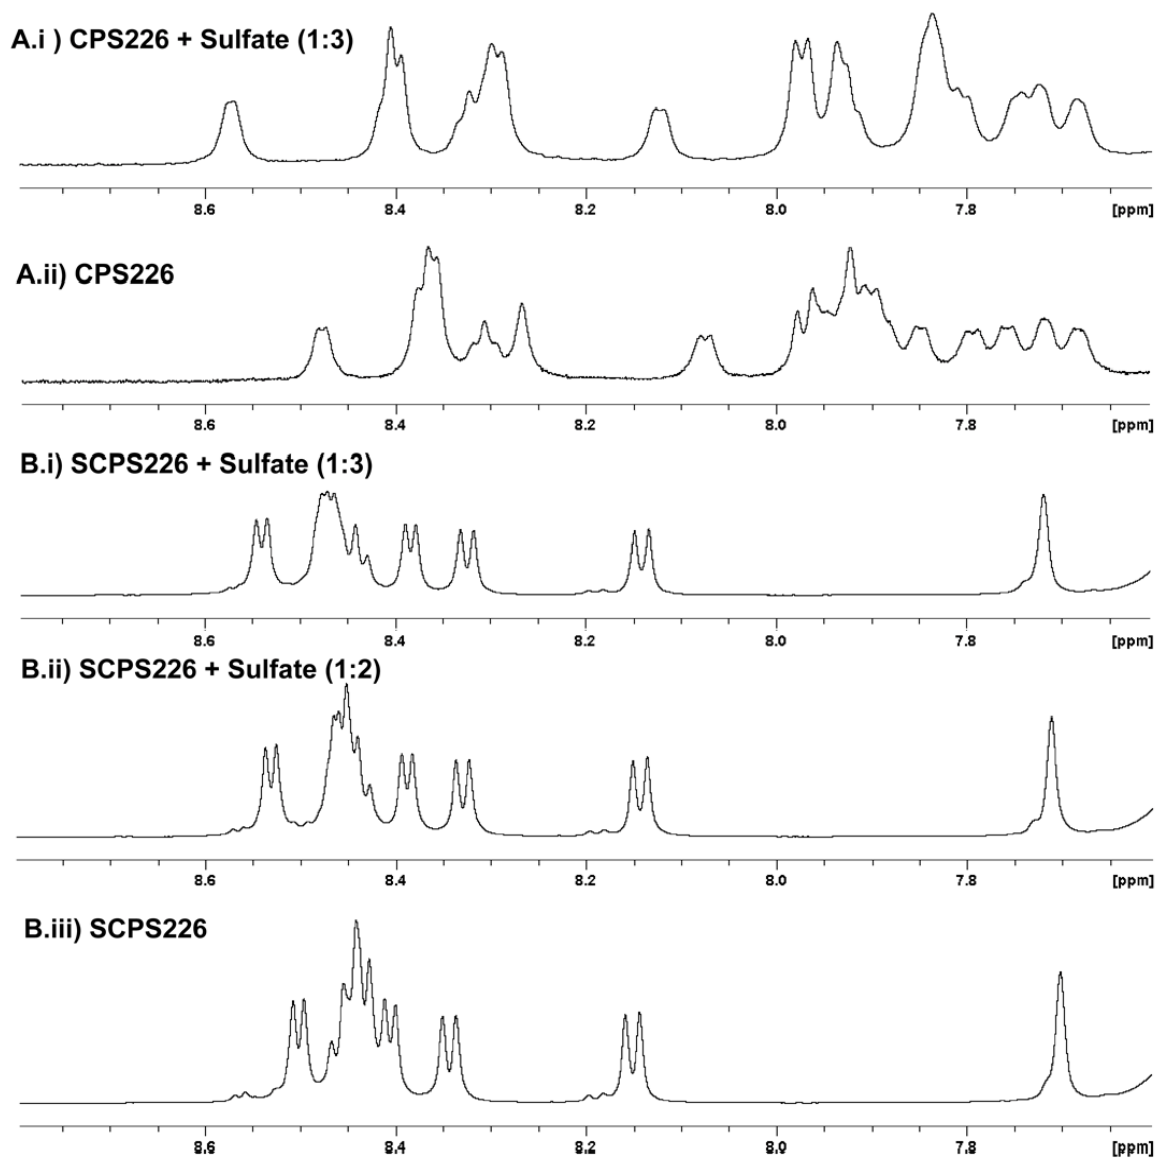

**Figure S17:** 1D spectra of main-chain HN region A)CPS226 and B) SCPS226 showing the effect of addition of sulfate ion to it in fully aqueous condition.

**Table-S1.** Comparison of sulfate ion bound 'G-S-A-K' motif structure obtained from NMR experiments of CPS226 with that of crystal structure in 1YCC deposited in pdb. Propagation of H-bonds in the crystal structure was calculated using DSSP Program (residue, secondary structure, propagation of H-bonds).

| GSAK motif                            | Structures of the motif deposited in pdb** |               |                |        |                                           | Experimental study of the motif in solution |                         |                                                      |                 |
|---------------------------------------|--------------------------------------------|---------------|----------------|--------|-------------------------------------------|---------------------------------------------|-------------------------|------------------------------------------------------|-----------------|
|                                       | Distance (Å)                               |               | Dihedral angle |        | H-bond observed (DSSP) <sup>4</sup>       | Expected NN noe in NMR                      | Observed NMR parameters |                                                      | Proposed H-bond |
|                                       | Residue                                    | NH-NH (i,i+1) | Residue        | φ      | ψ                                         |                                             | Residue                 | NH-NH noe (i,i+1)                                    |                 |
|                                       |                                            |               |                |        | CO→NH<br>H<br>(i→i+4)<br>(i→i+3)<br>a b c |                                             |                         | CO→NH<br>(i→i+3) &<br>(i→i+4)                        |                 |
| **                                    | G/S                                        | 3.86          | G1             | -131.8 | -146.2                                    | G                                           | weak                    |                                                      |                 |
| 1YCC                                  | (1/2)                                      |               |                |        |                                           | G                                           | (w)                     |                                                      |                 |
| (SO <sub>4</sub> <sup>2-</sup> bound) | S/A                                        | 4.18          | S2             | -97.3  | 115.6                                     | S                                           | >                       | weak                                                 |                 |
|                                       | (2/3)                                      |               |                |        |                                           | A                                           | H >                     | (w)                                                  |                 |
|                                       | A/K                                        | 2.95          | A3             | -67.7  | -35.0                                     | K                                           | H >                     | strong                                               |                 |
|                                       | (3/4)                                      |               |                |        |                                           | K                                           | H >                     | (s)                                                  |                 |
|                                       | K/K                                        | 2.27          | K4             | -68.1  | -47.8                                     | G                                           | H X                     | strong                                               |                 |
|                                       | (4/5)                                      |               |                |        |                                           | A                                           | H X                     | (s)                                                  |                 |
|                                       |                                            |               | K5             | -57.8  | -39.9                                     |                                             |                         |                                                      |                 |
| CPS226                                | G/S                                        |               |                |        |                                           |                                             |                         |                                                      |                 |
|                                       | (1/2)                                      |               |                |        |                                           | G(1)                                        | (1/2)                   | O <sub>1</sub> (SO <sub>4</sub> <sup>2-</sup> ) → A3 |                 |
|                                       | S/A                                        |               |                |        |                                           |                                             | weak                    | O <sub>4</sub> (SO <sub>4</sub> <sup>2-</sup> ) → K4 |                 |
|                                       | (2/3)                                      |               |                |        |                                           | S(2)                                        | (2/3)                   | G1 → A5                                              |                 |
|                                       | A/K                                        |               |                |        |                                           |                                             | weak                    | S2 → B6                                              |                 |
|                                       | (3/4)                                      |               |                |        |                                           | A(3)                                        | (3/4)                   |                                                      |                 |
|                                       | K/A                                        |               |                |        |                                           |                                             | strong                  |                                                      |                 |
|                                       | (4/5)                                      |               |                |        |                                           | K(4)                                        | (4/5)                   |                                                      |                 |
|                                       |                                            |               |                |        |                                           |                                             | strong                  |                                                      |                 |
